# Supplementary material for: Validation of Low-Cost Sensors in Measuring Real-Time PM10 Concentrations at Two Sites in Delhi National Capital Region
Source: MDPI journal article supplement (doi:10.3390/s20051347), 2020-02-29
Supplement: s1 [file s1]

**Supporting Information for “Validation of low-cost sensors in measuring real-time PM<sub>10</sub> concentrations at two sites in Delhi National Capital Region.”**

**Supplementary Table S1.** Technical specification of the Plantower PM sensor used in the present study.

| Parameter                            | Index                       | Unit               |
|--------------------------------------|-----------------------------|--------------------|
| Range of measurement                 | 0.3~1.0, 1.0~2.5, 2.5~10    | μm                 |
| Counting Efficiency                  | 50% at 0.3μm 98% at ≥ 0.5μm | %                  |
| Effective Range                      | 0~500                       | μg·m <sup>-3</sup> |
| Maximum Range                        | ≥1000                       | μg·m <sup>-3</sup> |
| Resolution                           | 1                           | μg·m <sup>-3</sup> |
| Standard Volume                      | 0.1                         | L                  |
| Single Response Time                 | < 1                         | s                  |
| Total Response Time                  | ≤ 10                        | s                  |
| Working Temperature Range            | -10 to + 60                 | °C                 |
| Working Humidity Range               | 0~99                        | %                  |
| Minimum distinguishable particle dia | 0.3                         | μm                 |
| Physical Size                        | 48 × 37 × 12                | mm <sup>3</sup>    |

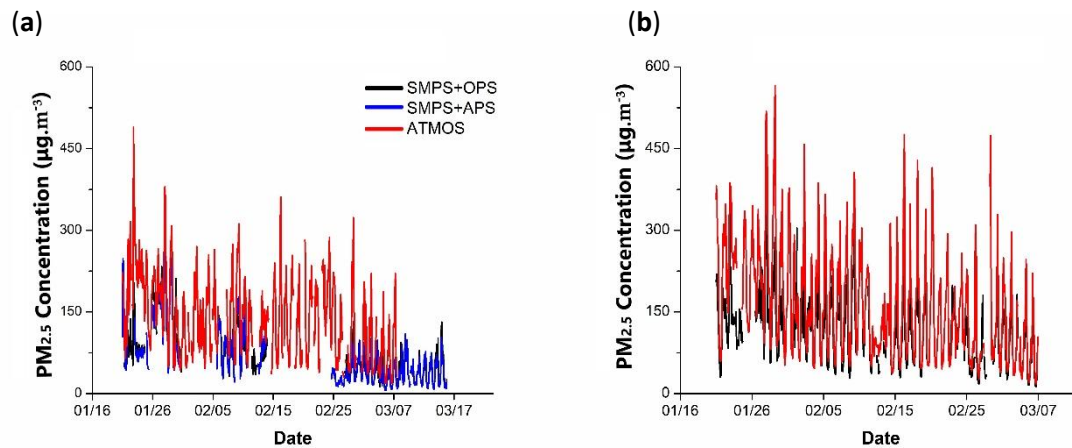

**Supplementary Figure S1.** Time series of ambient PM<sub>2.5</sub> concentrations (μg·m<sup>-3</sup>) data collected from Atmos PMS7003 sensor and reference instruments (merged PM<sub>2.5</sub> from SPMP-OPS and SMPS-APS) during the deployment period at (a) Manav Rachna International Institute of Research and Studies, Faridabad (MRIU) and (b) Indian Institute of Technology Delhi (IITD) monitoring sites.

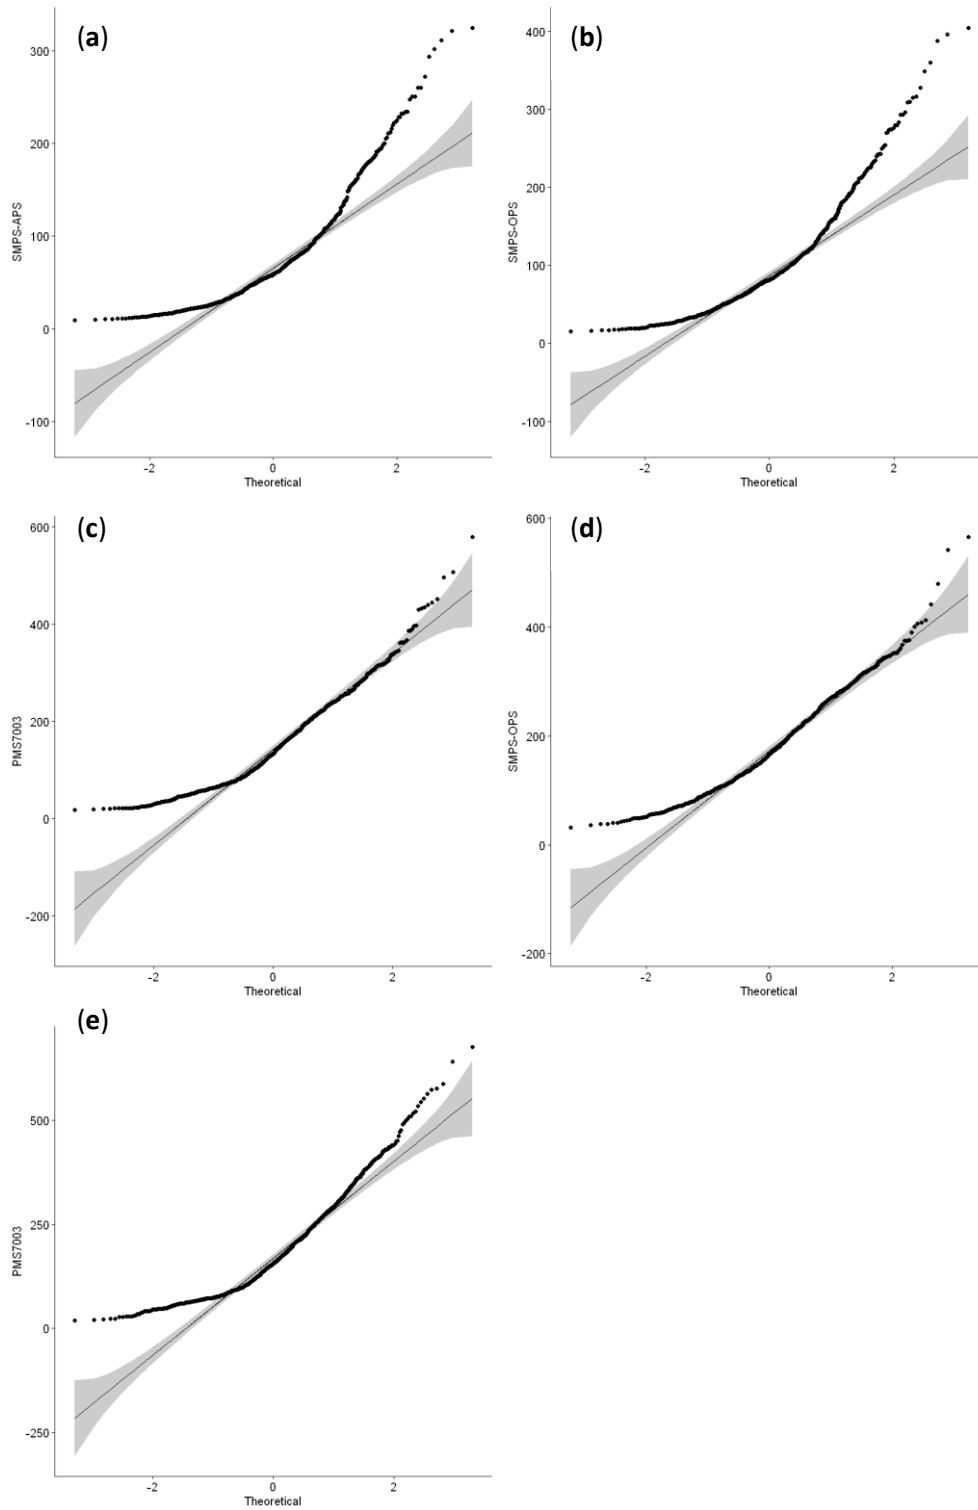

**Supplementary Figure S2.** (a–c) from left to right represents Quantile-Quantile (QQ)-plots for measured  $PM_{10}$  from merged SMPS–APS , merged SMPS–OPS, and un-calibrated Plantower PMS7003 sensor, respectively at Manav Rachna International Institute of Research and Studies, Faridabad (MRIU) and (d,e) represents the QQ-plots for merged SMPS–OPS and un-calibrated PMS7003 from Indian Institute of Technology Delhi (IITD), respectively.

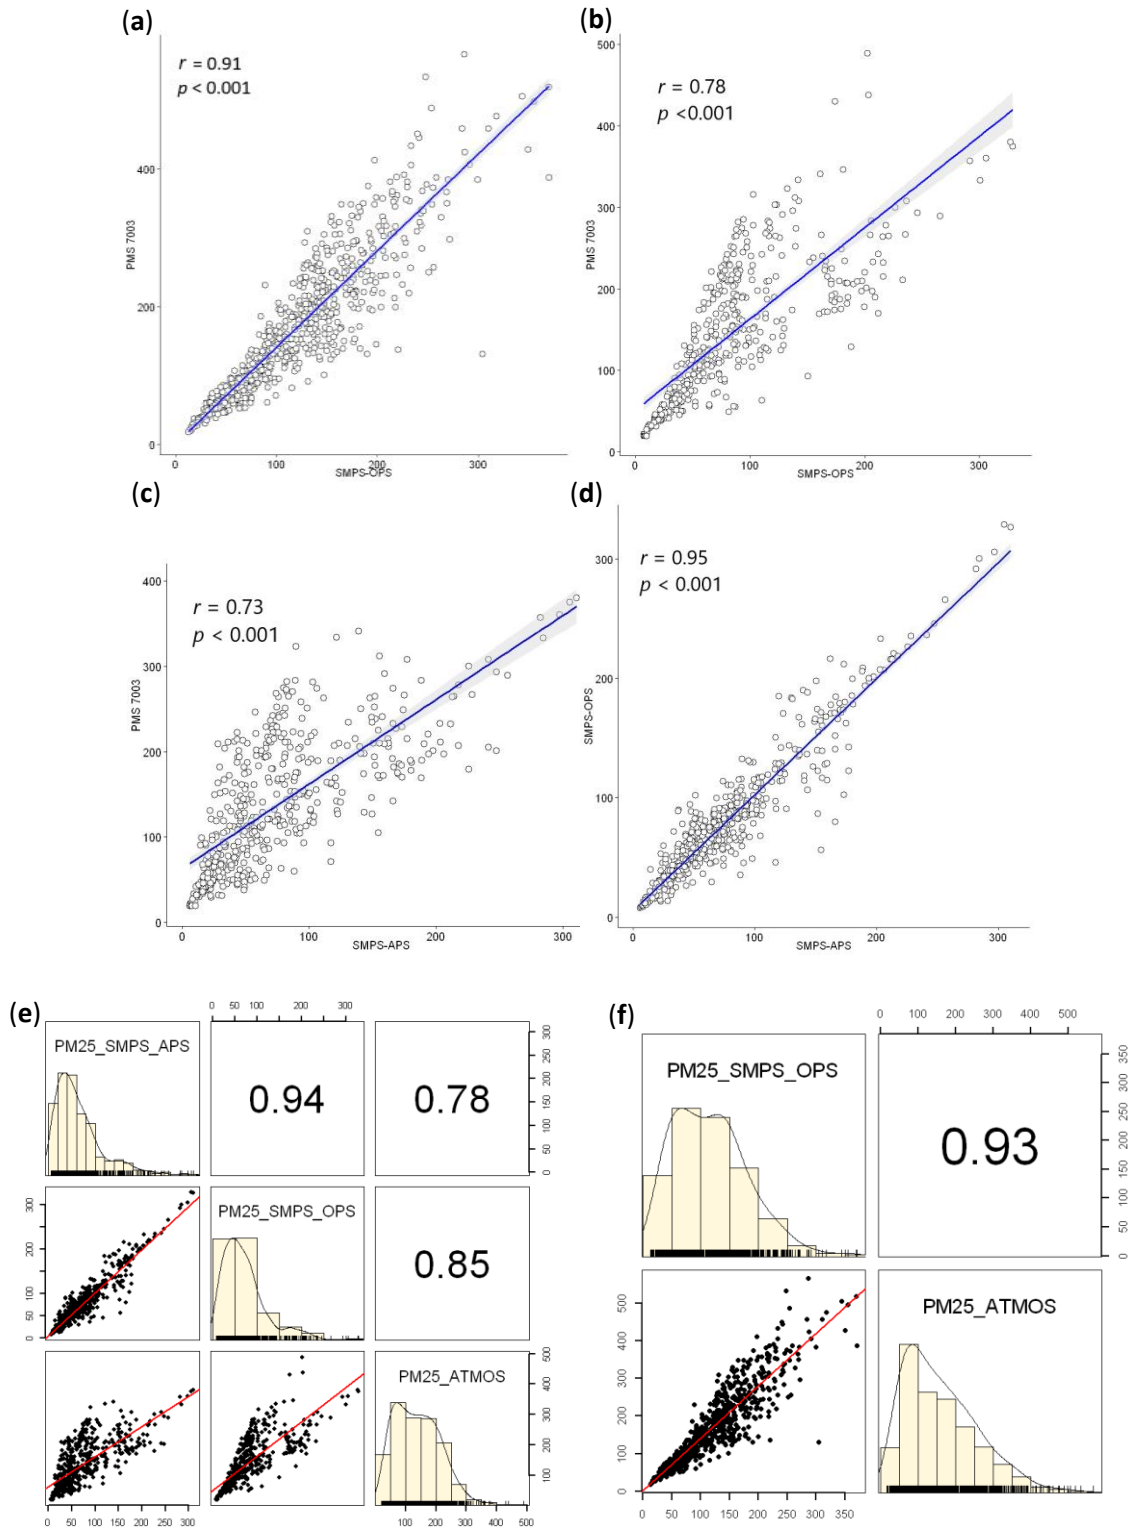

**Supplementary Figure S3.** (a–d) Scatter plots for measured PM<sub>2.5</sub> between (a) SMPS-OPS and Atmos at Indian Institute of Technology Delhi (IITD) and Manav Rachna International Institute of Research and Studies, Faridabad (MRIU) between, (b) SMPS-OPS and PMS 7003, (c) SMPS-APS and SMPS-OPS, and (d) SMPS-APS and Atmos, respectively with their respective  $r_s$  and  $p$ -values, (e) pairwise correlation and data distribution of measured PM<sub>2.5</sub> between SMPS-OPS, SMPS-APS, and Atmos at MRIU site, and (f) pairwise correlation and data distribution of SMPS-OPS and Atmos at IITD site. The grey area along the black line represents the 95% confidence interval of regression. Numeric values in upper halves represent the Spearman's coefficients.

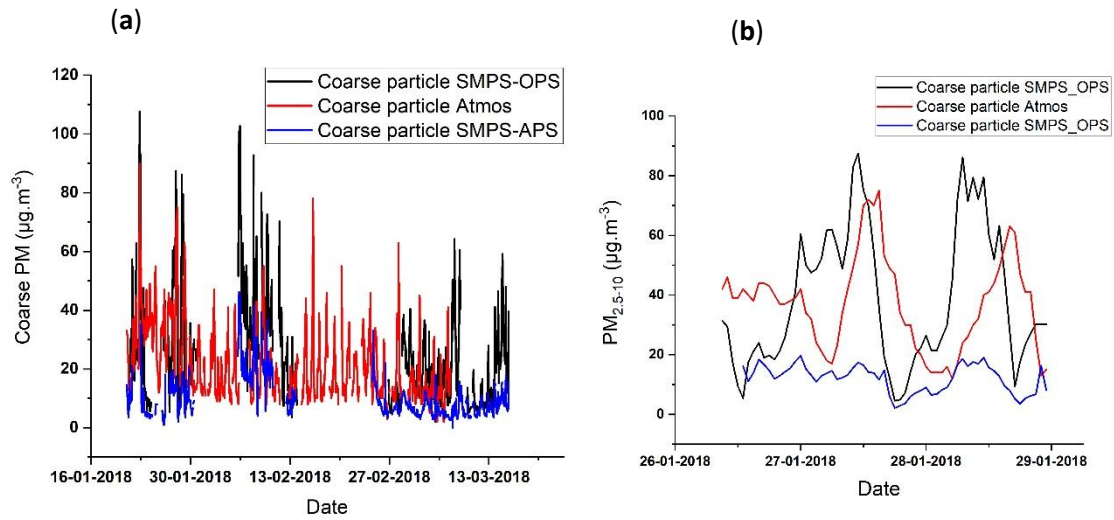

**Supplementary Figure S4.** Time series of coarse particle  $PM_{2.5-10}$  measured from merged SMPS-APS, merged SMPS-OPS, and Atmos at (a) Manav Rachna International Institute of Research and Studies, Faridabad (MRIU), Faridabad during the whole study period and (b) for a small section of time series with common collocated data points.
